## Impact of concomitant mitral regurgitation in severe aortic stenosis in Japan – from the CURRENT AS registry

R. Murai<sup>1</sup>, Y. Kawase<sup>1</sup>, T. Taniguchi<sup>2</sup>, T. Morimoto<sup>3</sup>, T. Maruo<sup>1</sup>, Y. Fuku<sup>1</sup>, K. Kadota<sup>1</sup>, T. Kimura<sup>4</sup>

<sup>1</sup>Kurashiki Central Hospital, Department of Cardiology, Kurashiki, Japan; <sup>2</sup>Kokura Memorial Hospital, Kokura, Japan; <sup>3</sup>Hyogo Medical University, Nishinomiya, Japan; <sup>4</sup>Kyoto University Graduate School of Medicine, Kyoto, Japan

On behalf of The CURRENT AS Registry Investigators

**Funding Acknowledgement:** Type of funding source: None

**Background:** Clinical significance of concomitant mitral regurgitation (MR) in patients with severe aortic stenosis (AS) has not been well-studied.

**Purpose:** The purpose of this study is to investigate the prognostic impact of concomitant MR in patients with severe AS.

**Method:** We used the data of 3815 patients from the CURRENT AS registry, a retrospective multicenter registry of severe AS in Japan. We compared the clinical outcomes between patients with moderate/severe MR and with none/mild MR according to the initial treatment strategies (initial aortic valve replacement [AVR] or conservative strategy). The primary outcome measure was a composite of aortic valve-related death and heart failure hospitalisation.

**Results:** Among the study population, moderate/severe MR were observed in 227/1197 (19%) patients with initial AVR strategy and in 536/2618 (20%) patients with conservative strategy. Among survivors with the ini-

tial AVR strategy, moderate/severe MR improved in 61/62 (98%) patients with concomitant mitral procedures. The crude cumulative 5-year incidence of the primary outcome measure was significantly higher in patients with moderate/severe MR than in those with none/mild MR regardless of the treatment strategies (25.2% vs. 14.4%,  $P < 0.001$  in the initial AVR strategy; 63.3% vs 40.7%,  $P < 0.001$  in the conservative strategy). Multivariate analysis revealed moderate/severe MR at index echocardiography was independently associated with higher risk for the primary outcome measure in conservative strategy (adjusted HR 1.20, 95% CI 1.03–1.40,  $P = 0.023$ ), but not associated in the initial AVR strategy (adjusted HR 1.20, 95% CI 0.82–1.80,  $P = 0.339$ ).

**Conclusion:** Moderate/severe MR was independently associated with poorer outcome in patients with severe AS who were managed conservatively, but not in those with initial AVR strategy.
